# Supplementary material
Source: PubMed Central journal article supplement (PMC2945585)

## SUPPLEMENTARY INFORMATION

### Introduction of the site-directed mutations in the *mrp* operon

For construction of pTFCHS7MrpA-Y136A, pTFCHS7MrpA-E140A, pTFCHS7MrpA-K223A, pTFCHS7MrpA-H230A, pTFCHS7MrpA-H230K, pTFCHS7MrpA-W232A, pTFCHS7MrpA-Y258A, pTFCHS7MrpA-K299A, pTFCHS7MrpA-H345A, pTFCHS7MrpA-G392A, and pTFCHS7MrpA-G392R, pGEMmrp*EcoRI-NsiI* containing part of *mrpA* gene except for the 3' region was constructed. The truncated *mrpA* fragment of *EcoRI*- and *NsiI*-digested pGEMmrp16-7 was ligated with the *EcoRI*- and *NsiI*-digested pGEM7zf(+), yielding pGEMmrp*EcoRI-NsiI*. This plasmid was methylated and then used as a template for the mutagenesis system in which PCR was performed with respective sets of primers that contained the target mutations. All primer sequences are provided in Table S2. The PCR products were transformed into *E. coli* DH5 $\alpha$ -T1<sup>R</sup>. The host cell circularized the linear mutated DNA, and McrBC endonuclease in the host cell digested the methylated template DNA, leaving only unmethylated, mutated product. For the construction of plasmid possessing full length *mrp*, the fragments containing one mutation from *EcoRI*- and *NsiI*-digested pGEMmrp*EcoRI-NsiI* were ligated with pGEMmrpTFCHS7 digested by *EcoRI-NsiI*.

For construction of pTFCHS7MrpA-F405A, pTFCHS7MrpA-H700A, pTFCHS7MrpA-H700K, pTFCHS7MrpA-H700W, pTFCHS7MrpB-H34A, pTFCHS7MrpB-P37G, pTFCHS7MrpB-F41A, pTFCHS7MrpC-Q70A, pTFCHS7MrpC-T75A, pTFCHS7MrpC-G82I and pTFCHS7MrpC-G82P, pGEMmrpTFCHS7-*PstI* containing part of the *mrpA* to *mrpC* region was constructed. The *mrpA* to *mrpC* fragments of *PstI*-digested pGEMmrpTFCHS7 were ligated with the *PstI*-digested pGEM5zf(+), yielding pGEMmrpTFCHS7-*PstI*. The subsequent methods were the same as described above. For the construction of plasmid possessing full length *mrp*, the fragments containing one mutation from *PstI*-digested pGEMmrp*PstI* were ligated with pGEMmrpTFCHS7 digested by *PstI*.

For construction of pTFCHS7MrpD-F135A, pTFCHS7MrpD-F136A, pTFCHS7MrpD-F136G, pTFCHS7MrpD-F136E, pTFCHS7MrpD-F136T, pTFCHS7MrpD-E137A, pTFCHS7MrpD-E137D, pTFCHS7MrpD-E137Q, pTFCHS7MrpD-K219A and pTFCHS7MrpD-W228A, pGEMmrp-*SphI* containing *mrpD* and the downstream region was constructed. pGEMmrpTFCHS7 was digested by *SphI* and self-ligated in order to remove the *mrpA* to *mrpC* region, yielding pGEMmrp-*SphI*. The same subsequent methods as described above were then used. For the construction of plasmid possessing full length *mrp*, the *mrpA* to *mrpC* fragments of *SphI*-digested pGEMmrpTFCHS7 were ligated with the *SphI*-digested pGEMmrp-*SphI* containing one mutation.

For construction of pTFCHS7MrpE-T113A, pTFCHS7MrpE-T113Y,

pTFCHS7MrpE-P114A and pTFCHS7MrpE-P114G, the strategy was described previously [main text (22)].

For construction of pTFCHS7MrpF-P28G, pTFCHS7MrpF-D32A, pTFCHS7MrpF-R33A, pTFCHS7MrpG-P81G, and pTFCHS7MrpG-P81A, pGEMmrp-*Bam*HI containing the *mrpE* to *mrpG* region was constructed. The *mrpE* to *mrpG* fragment of *Bam*HI-digested pGEMmrpTFCHS7 was ligated with the *Bam*HI-digested pGEM7zf(+), yielding pGEMmrp-*Bam*HI. The same methods described above were then followed. For the construction of plasmid possessing full length *mrp*, each pGEMmrp-*Bam*HI containing one of the mutations was digested by *Bam*HI and ligated with pGEMmrpTFCHS7 digested by *Bam*HI.

## Supplementary Figure Legends

**Figure S1. Alignment of Mrp subunits of *Bacillus pseudofirmus* OF4 with Mrp subunits from various organisms.** The alignment was carried out by the ClustalW program. Amino acid sequence sources are BP, *Bacillus pseudofirmus* OF4, BH, *Bacillus halodurans* C-125, BS, *Bacillus subtilis* 168, SA, *Staphylococcus aureus* (in which Mrp is named Mnh), SM, *Sinorhizobium meliloti* (in which Mrp is named Pha), PA, *Pseudomonas aeruginosa* and VC, *Vibrio cholerae*. Sequence sources of NDH-1 Subunits are EC, *Escherichia coli* and RC, *Rhodobacter capsulatus*. Transmembrane segments were predicted and shown by 3 colors, yellow, green and blue. Con PredII (<http://bioinfo.si.hirosaki-u.ac.jp/~ConPred2/>), HMMTOP (<http://www.emzim.ju/hmmtop/>) and TMHMM (<http://www.cbs.dtu.dk/services/TMHMM/>) were used to predict secondary structure of each Mrp subunit. The stretches of residues in which three methods agreed in their prediction of a transmembrane segment are highlighted in yellow, and areas in which two or fewer methods agreed are in green. The stretches of residues in which HMMTOP and TMHMM, but not Con Pred II methods agreed in their prediction of a transmembrane segment are highlighted in blue. Amino acid residues indicated by a red “Na” have been proposed to have roles in Na<sup>+</sup> binding [main text (38)]. Histidine residues indicated by a red “Q” are in possible quinone-binding sites [main text (35-37)]. Mutations of glycine residues indicated by a red “C-125” have been previously reported to lead to alkali-sensitivity in *B. halodurans* C-125 [main text (11)].

**Figure S2. Effect of mutations on the capacity of Mrp systems to complement the sodium-sensitivity of *E. coli* KNabc.** *E. coli* KNabc transformants were grown at 37 °C for 16 h in LBK medium, at pH 7.5, containing added NaCl at the indicated concentrations. The A<sub>600</sub> of the cultures was then measured. The error bars indicate standard deviations for the results from

duplicate cultures in three independent experiments.

**Figure S3. Na<sup>+</sup>/H<sup>+</sup> antiport activity in everted membrane vesicles from *E. coli* KNabc transformants expressing mutant Mrp constructs.** Details of the methods for preparation and assays of membrane vesicles are described under Experimental Procedures. 2 mM Tris-succinate was used to energize the everted membrane vesicles. The arrow indicates the time at which the addition of 10 mM NaCl was made. The assay buffer contained BTP-chloride buffer, which contains 140 mM choline chloride, 10mM Bis Tris propane and 5 mM magnesium chloride and was adjusted to pH 8.0, 8.5 or 9.0 with sulfuric acid.

**Figure S4. Immunoblot analysis of everted membrane vesicles from *E. coli* KNabc transformants.** For each sample, thirty micrograms of protein was loaded on to the SDS-PAGE gels. Mrp subunits were detected with antibodies against unique epitope tags linked to their carboxy-terminus or, in the case of MrpE and MrpF, the subunits were detected with polyclonal antibodies raised against the proteins [main text (22)].

**Figure S5. Detection of Mrp complexes by immunoblot analysis of BN-PAGE.** Samples containing thirty micrograms of protein extracted from membranes using 1% DDM were loaded on BN-PAGE. BN-PAGE was carried according to instructions provided by the manufacturer (Invitrogen). Mrp subunits were detected with the same antibodies as used in the SDS-PAGE analysis. The results of the detection of MrpA and MrpD in MrpE T113A and P114G mutants in Figure S5H have been reported in a previous paper [main text (22)]. In a few instances, not every subunit was well detected, in the immunoblots in Fig. S5, in positions corresponding to monomeric or dimeric MrpA-to-MrpG complexes., Since those complexes are only formed when all seven Mrp proteins are present [main text (22)], the clear presence of multiple Mrp proteins at hetero-oligomer positions is scored as a “+” in the MrpA-G dimer or monomer column even if one or more other Mrp proteins are not well resolved.

**Figure S6. Analysis of two mutants in category “complex formation” by two dimensional Blue native/SDS-PAGE.** Thirty microgram of extracted proteins was loaded on one dimensional BN-PAGE. Then each lane was denatured in buffer containing of 50mM Tris-HCl (pH6.8), 2% SDS and 1% 2-mercaptoethanol for 30 min. The denatured BN-lanes were put on 2D SDS-PAGE gel and run. After transferred to nitrocellulose membrane, MrpE proteins were detected. Detail methods of BN-PAGE, SDS-PAGE and immunoblotting were described in Experimental Procedures. Values on top of the figure indicate the molecular weight of protein maker in 1D BN-PAGE.

TABLE S1. Bacterial strains and plasmids used in this study

| Strain and plasmid     | Genotype and description                                                                                                                                                                                | Source and reference |
|------------------------|---------------------------------------------------------------------------------------------------------------------------------------------------------------------------------------------------------|----------------------|
| <i>E. coli</i> Strains |                                                                                                                                                                                                         |                      |
| DH5 $\alpha$ MCR       | F <sup>-</sup> <i>mcrA</i> $\Delta$ 1 ( <i>mrr-hsd RMS-mcrBC</i> ) $\Phi$ 80 <i>dlacZ</i> $\Delta$ ( <i>lacZYAargF</i> ) U169<br><i>deoR recA1 endA1 supE44 <math>\lambda</math>thi-1 gyr-496 relA1</i> | Stratagene           |
| KNabc                  | TG1 ( $\Delta$ <i>nhaA</i> $\Delta$ <i>nhaB</i> $\Delta$ <i>chaA</i> )                                                                                                                                  | (1)                  |
| Plasmids               |                                                                                                                                                                                                         |                      |
| pGEM-5zf(+)            | Cloning vector; Ap <sup>R</sup>                                                                                                                                                                         | Promega              |
| pGEM-7zf(+)            | Cloning vector; Ap <sup>R</sup>                                                                                                                                                                         | Promega              |
| pGEMOF4mrp16           | pGEM7Zf(+)+full <i>mrp</i> operon from <i>B. pseudofirmus</i> OF4                                                                                                                                       | (2)                  |
| pGEMmrpTFCHS7          | pGEMOF4mrp16, MrpA-T7 tag, MrpB-FLAG tag, MrpC- <i>c-myc</i> tag,<br>MrpD-His <sub>7</sub> tag, MrpG-S-tag with mutation free                                                                           | (2)                  |
| pTFCHS7MrpA-Y136A      | pGEMmrpTFCHS7, MrpA-Y136A                                                                                                                                                                               | This study           |
| pTFCHS7MrpA- E140A     | pGEMmrpTFCHS7, MrpA-E140A                                                                                                                                                                               | This study           |
| pTFCHS7MrpA-K223A      | pGEMmrpTFCHS7, MrpA-K223A                                                                                                                                                                               | This study           |
| pTFCHS7MrpA-H230A      | pGEMmrpTFCHS7, MrpA-H230A                                                                                                                                                                               | This study           |
| pTFCHS7MrpA-H230K      | pGEMmrpTFCHS7, MrpA-H230K                                                                                                                                                                               | This study           |
| pTFCHS7MrpA-W232A      | pGEMmrpTFCHS7, MrpA-W232A                                                                                                                                                                               | This study           |
| pTFCHS7MrpA-Y258A      | pGEMmrpTFCHS7, MrpA-Y258A                                                                                                                                                                               | This study           |
| pTFCHS7MrpA -K299A     | pGEMmrpTFCHS7, MrpA-K299A                                                                                                                                                                               | This study           |
| pTFCHS7MrpA-H345A      | pGEMmrpTFCHS7, MrpA-H345A                                                                                                                                                                               | This study           |
| pTFCHS7MrpA-G392A      | pGEMmrpTFCHS7, MrpA-G392A                                                                                                                                                                               | This study           |
| pTFCHS7MrpA-G392R      | pGEMmrpTFCHS7, MrpA-G392R                                                                                                                                                                               | This study           |
| pTFCHS7MrpA -F405A     | pGEMmrpTFCHS7, MrpA-F405A                                                                                                                                                                               | This study           |
| pTFCHS7MrpA-H700A      | pGEMmrpTFCHS7, MrpA-H700A                                                                                                                                                                               | This study           |
| pTFCHS7MrpA-H700K      | pGEMmrpTFCHS7, MrpA-H700K                                                                                                                                                                               | This study           |
| pTFCHS7MrpA-H700W      | pGEMmrpTFCHS7, MrpA-H700W                                                                                                                                                                               | This study           |
| pTFCHS7MrpB-H34A       | pGEMmrpTFCHS7, MrpB-H34A                                                                                                                                                                                | This study           |
| pTFCHS7MrpB-P37G       | pGEMmrpTFCHS7, MrpB-G37G                                                                                                                                                                                | This study           |
| pTFCHS7MrpB-F40A       | pGEMmrpTFCHS7, MrpB-F40A                                                                                                                                                                                | This study           |
| pTFCHS7MrpC-Q70A       | pGEMmrpTFCHS7, MrpC-Q70A                                                                                                                                                                                | This study           |
| pTFCHS7MrpC-T75A       | pGEMmrpTFCHS7, MrpC-T75A                                                                                                                                                                                | This study           |
| pTFCHS7MrpC-G82P       | pGEMmrpTFCHS7, MrpC-G82P                                                                                                                                                                                | This study           |
| pTFCHS7MrpC-G82I       | pGEMmrpTFCHS7, MrpC-G82I                                                                                                                                                                                | This study           |
| pTFCHS7MrpD-F135A      | pGEMmrpTFCHS7, MrpD-F135A                                                                                                                                                                               | This study           |

|                   |                           |            |
|-------------------|---------------------------|------------|
| pTFCHS7MrpD-F136A | pGEMmrpTFCHS7, MrpD-F136A | This study |
| pTFCHS7MrpD-F136G | pGEMmrpTFCHS7, MrpD-F136G | This study |
| pTFCHS7MrpD-F136T | pGEMmrpTFCHS7, MrpD-F136T | This study |
| pTFCHS7MrpD-F136E | pGEMmrpTFCHS7, MrpD-F136E | This study |
| pTFCHS7MrpD-E137A | pGEMmrpTFCHS7, MrpD-E137A | This study |
| pTFCHS7MrpD-E137Q | pGEMmrpTFCHS7, MrpD-E137Q | This study |
| pTFCHS7MrpD-E137D | pGEMmrpTFCHS7, MrpD-E137D | This study |
| pTFCHS7MrpD-K219A | pGEMmrpTFCHS7, MrpD-K219A | This study |
| pTFCHS7MrpD-W228A | pGEMmrpTFCHS7, MrpD-W228A | This study |
| pTFCHS7MrpE-T113A | pGEMmrpTFCHS7, MrpE-T113A | This study |
| pTFCHS7MrpE-T113Y | pGEMmrpTFCHS7, MrpE-T113Y | This study |
| pTFCHS7MrpE-P114G | pGEMmrpTFCHS7, MrpE-P114G | This study |
| pTFCHS7MrpE-P114A | pGEMmrpTFCHS7, MrpE-P114A | This study |
| pTFCHS7MrpF-P28G  | pGEMmrpTFCHS7, MrpF-P28G  | This study |
| pTFCHS7MrpF-D32A  | pGEMmrpTFCHS7, MrpF-D32A  | This study |
| pTFCHS7MrpF-R33A  | pGEMmrpTFCHS7, MrpF-R33A  | This study |
| pTFCHS7MrpG-P81G  | pGEMmrpTFCHS7, MrpG-P81G  | This study |
| pTFCHS7MrpG-P81A  | pGEMmrpTFCHS7, MrpG-P81A  | This study |

---

1. Nozaki, K., T. Kuroda, T. Mizushima, and T. Tsuchiya. (1998) *Biochim. Biophys. Acta* **1369**, 213-220.
2. Morino, M., Natsui, S., Swartz, T. H., Krulwich, T. A., and Ito, M. (2008) *J. Bacteriol.* **190**, 4162-4172

TABLE S2. Primers used in this study

| Primer       | Sequence (5'-3')                       | Accession number and corresponding sequence (nt) |
|--------------|----------------------------------------|--------------------------------------------------|
| MrpA-Y136A-F | CAGATAACTTAATTGTTCTTgcTGTATTTTGGG      | EF468713 (1138-1157)                             |
| MrpA-Y136-R  | AAGAACAATTAAGTTATCTGATAAGAC            | EF468713 (1131-1157 (minus strand))              |
| MrpA-E140A-F | GTTCTTTATGTATTTTGGGcATTAAC TAGTTTAGC   | EF468713 (1152-1186)                             |
| MrpA-E140-R  | CCAAAATACATAAAGAACAATTAAGTTATCTG       | EF468713 (1138-1169 (minus strand))              |
| MrpA-K223A-F | CTGCTTGGTGCATTCACTgcATCAGCACAGTTC      | EF468713 (1401-1433)                             |
| MrpA-K223-R  | AGTGAATGCACCAAGCAGCACTA                | EF468713 (1396-1418 (minus strand))              |
| MrpA-H230A-F | CACTAAATCAGCACAGTTCcCATCTGGCTG         | EF468713(1415-1451)                              |
| MrpA-H230K-F | CACTAAATCAGCACAGTTCcCaAaATCTGGCTG      | EF468713(1415-1451)                              |
| MrpA-H230-R  | GAATGGGAAGTGTGCTGATTTAGTGAATGCAC       | EF468713(1408-1439(minus strand))                |
| MrpA-W232A-F | CAGTTCcCATTCACATCgcGCTGCCAGATGC        | EF468713 (1428-1459)                             |
| MrpA-W232-R  | GATGTGGAATGGGAAGTGTGCTG                | EF468713 (1423-1445 (minus strand))              |
| MrpA-Y258A-F | CGATGGTTAAAGCAGGAATCgcTCTTGTGTCACG     | EF468713 (1504-1537)                             |
| MrpA-Y258-R  | GATTCCTGCTTTAACCATCGTTGCAG             | EF468713 (1498-1523 (minus strand))              |
| MrpA-K299A-F | CTGTCAGACAAAAGACTTAgcAGGAATCCTTGCC     | EF468713 (1627-1661)                             |
| MrpA-K299-R  | TAAGTCTTTTTGTCTGACAGCAGATGTTG          | EF468713 (1618-1646(minus strand))               |
| MrpA-H345A-F | GGCTGCGATTTTgcCTTAATAATCATGCG          | EF468713 (1772-1802)                             |
| MrpA-H345-R  | GAAAATCGCAGCATTATGGCAAAC               | EF468713 (1760-1784 (minus strand))              |
| MrpA-G392A-F | TTACGGTTTCATTAATGcACTCGCCTCA           | EF468713 (1909-1937)                             |
| MrpA-G392R-F | TTACGGTTTCATTAATcGACTCGCCTCA           | EF468713 (1909-1937)                             |
| MrpA-G392-R  | AATTAATGAAACCGTAAATGTGACCGGC           | EF468713 (1989-1925 (minus strand))              |
| MrpA-F405A-F | GCCTTCCACCATTAAACGGGgcCTTAAGTAAGG      | EF468713 (1945-1977)                             |
| MrpA-F405-R  | CCCGTTAAATGGTGAAGGCTGCCATT             | EF468713 (1937-1964 (minus strand))              |
| MrpA-H700A-F | GCTTTTAATGCTTGCATCTACgcCTTACCAGAACTTCG | EF468713 (2828-2866)                             |
| MrpA-H700K-F | GCTTTTAATGCTTGCATCTACaAaTTACCAGAACTTCG | EF468713(2828-2866)                              |
| MrpA-H700W-F | GCTTTTAATGCTTGCATCTACtgTACCAGAACTTCG   | EF468713(2828-2866)                              |
| MrpA-H700-R  | GTAGAATGCAAGCATTAAAAGCAGTACTG          | EF468713 ( 2821-2849(minus strand))              |
| MrpB-H34A-F  | TCTACCTATTCTTCGCCGGGgcTAATAATCCCGG     | EF468713 (3296-3329)                             |
| MrpB-H34-R   | CCCGCGAAGAATAGGTAGACAGAAA              | EF468713 (3290-3315 (minus strand))              |
| MrpB-P37G-F  | CTTCGCCGGGCATAATAATggCGGAGGAGGA        | EF468713 ( 3306-3336)                            |
| MrpB-P37-R   | ATTATTATGCCCGCGGAAGAATAGG              | EF468713 (3300-3324 (minus strand))              |
| MrpB-F40A-F  | ATAATAATCCCGGAGGAGGAgcTATTGGGGGGTT     | EF468713 (3317-3350)                             |
| MrpB-F40-R   | TCCTCCTCCGGGATTATATGCCC                | EF468713 (3314-3336 (minus strand))              |
| MrpC-Q70A-F  | CTTATTCTGACCCGTTGCCAgcAGCATTGATTTTG    | EF468713 (3886-3920)                             |
| MrpC-Q70-R   | TGGCAACGGGTCAGAATAAGTTGTTGC            | EF468713 ( 3879-3905(minus strand))              |
| MrpC-T75A-F  | GCCACAAGCATTGATTTTgCAGCAATTGT          | EF468713 (3902-3931)                             |
| MrpC-T75-R   | CAAAATCAATGCTTGTGGCAACGGGTCAG          | EF468713 ( 3892-3920(minus strand))              |
| MrpC-G82P-F  | CAATTGTTATTAGTTTTccGGTCACTTCATTC       | EF468713 (3925-3956)                             |
| MrpC-G82I-F  | CAATTGTTATTAGTTTTattGTCACCTTCATTC      | EF468713 (3925-3956)                             |
| MrpC-G82-R   | AAAAC TAATAACAATTGCTGTCAAAAATC         | EF468713 ( 3914-3941(minus strand))              |
| MrpD-F135A-F | CTTATTTAATCTATTTCGTAgcCTTCGAGGTTATGC   | EF468713 (4467-4501)                             |
| MrpD-F135-R  | TACGAATAGATTAAATAAGTCTCCTG             | EF468713 (4460-4485 (minus strand))              |
| MrpD-F136A-F | TTTAATCTATTTCGTATTcgcCGAGGTTATGCTG     | EF468713 (4471-4503)                             |
| MrpD-F136G-F | TTTAATCTATTTCGTATTcggCGAGGTTATGCTG     | EF468713 (4471-4503)                             |
| MrpD-F136E-F | TTTAATCTATTTCGTATTcgaaGAGGTTATGCTG     | EF468713 (4471-4503)                             |
| MrpD-F136T-F | TCTATTTCGTATTcAcCGAGGTTATGCTGA         | EF468713 (4476-4504)                             |
| MrpD-F136-R  | GAATACGAATAGATTAAATAAGTCTCCTG          | EF468713 ( 4460-4488(minus strand))              |
| MrpD-E137A-F | CTTATTTAATCTATTTCGTATTCTTCGcGGTTATGCTG | EF468713 (4467-4503)                             |

|              |                                        |                                     |
|--------------|----------------------------------------|-------------------------------------|
| MrpD-E137Q-F | CTTATTTAATCTATTTCGTATTCTTCcAGGTTATGCTG | EF468713(4467-4503)                 |
| MrpD-E137D-F | CTTATTTAATCTATTTCGTATTCTTCGAcGTTATGCTG | EF468713(4467-4503)                 |
| MrpD-E137-R  | GAAGAATACGAATAGATTAATAAAGTCTCCTG       | EF468713 ( 4460-4491(minus strand)) |
| MrpD-K219A-F | TATTTTCTTAGTTGTATTTGCAATGgcGGCCGGTCTC  | EF468713(4713-4749)                 |
| MrpD-K219-R  | CATTGCAAATACAACATAAGAAAATAACCGCAA      | EF468713(4706-4737(minus strand))   |
| MrpD-W228A-F | GTCTCTTCCCCTTTACTTCgcGCTTCCACGTT       | EF468713 (4745-4777)                |
| MrpD-W228-R  | GAAGTAAAGGGGAAGAGACCGCCCTT             | EF468713 (4738-4764 (minus strand)) |
| MrpE-T113A-F | GCATCTCTTATCTCTCTTgCTCCAGGTAC          | EF468713 (5922-5950)                |
| MrpE-T113Y-F | GCATCTCTTATCTCTCTTtaTCCAGGTAC          | EF468713 (5922-5950)                |
| MrpE-T113-R  | AAGAGAGATAAGAGATGCTAGAAAGAC            | EF468713 (5914-5939 (minus strand)) |
| MrpE-P114G-F | GCATCTCTTATCTCTCTTACTggAGGTACACTA      | EF468713 (5922-5954)                |
| MrpE-P114A-F | GCATCTCTTATCTCTCTTACTgCAGGTACACTA      | EF468713 (5922-5954)                |
| MrpE-P114-R  | AGTAAGAGAGATAAGAGATGCTAGAAAGAC         | EF468713 (5914-5942 (minus strand)) |
| MrpF-P28G-F  | ATCCGTACATTAATCGGcgTACGATGTCTG         | EF468713 (6145-6175)                |
| MrpF-P28-R   | GCCGATTAATGTACGGATAAAGCAAACG           | EF468713 ( 6135-6162(minus strand)) |
| MrpF-D32A-F  | ATCGGCCCTACGATGTCTGcCCGCATCGTAGCGC     | EF468713 (6157-6190)                |
| MrpF-D32-R   | AGACATCGTAGGGCCGATTAATGTACGG           | EF468713 ( 6147-6174(minus strand)) |
| MrpF-R33A-F  | ATCGGCCCTACGATGTCTGACgcCATCGTAGCGC     | EF468713 (6157-6190)                |
| MrpF-R33-R   | GTCAGACATCGTAGGGCCGATTAATGTACGG        | EF468713 ( 6147-6177(minus strand)) |
| MrpG-P81G-F  | TTCGTTTTTCCTAACTGtgTGTAGCCGGAAT        | EF468713 (6566-6597)                |
| MrpG-P81A-F  | TTCGTTTTTCCTAACTGtGCTGTAGCCGGAAT       | EF468713(6566-6597)                 |
| MrpG-P81-R   | AGCAGTTAGGAAAACGAATAAAATCG             | EF468713 ( 6558-6583(minus strand)) |

---

Substituted nucleotides that were added to introduce point mutation sites are shown by a small letter.





EC\_NuoM YGAWMAFAQTDIRKRLIAYTSVSHMGFVLIAIYTGSQL-----AYOGAVIO 344  
RC\_NuoM YTSLVALAQEDMKKLIAYSSVAHMGYVTMGIFAANQQ-----GVDGAIFO 343  
EC\_NuoL LAGFAALVQTDIKRVLAYSTMSQIGYMFALGVQAWD-----AAIFH 334  
RC\_NuoL FAATVGLVQNDIKRVIAYSTMSQIGYMFVAAGSGVYS-----VAMFH 343  
EC\_NuoN FGNLMALSTNIKRLLYSSISHLGYLLVALIALQTG-----EMSMEAVGVY 329  
RC\_NuoN LGAIAGIGQRDIKRLMAYSSISHMGFGLGLAAGTAAG-----VESMLLY 326

i i TMS-12 C125

BP\_MrpA LINHATFKGSLFMTAG-IIDHETG--TRDIRKLGGLMAIMPVTFVSLIGLASMAG---- 398  
BH\_MrpA LINHATFKGSLFMTVG-IIDHETG--TRDIRKLGGLMAIMPVTFVSLIGLAAMAG---- 399  
BS\_MrpA LINHATFKGSLFMAVG-IIDHETG--TRDIRKLGGLMAIMPITFTISLIGTFSMAG---- 395  
SA\_MnhA LINHATFKGALFMITG-AVDHSTG--TRDVKKLGGLLTIMPISFTITVITALSMAAG---- 396  
SM\_PhaA1 IVNHATFKASLFMAAG-IIDHESG--TRDIRRLGGLFHFMPITATLAMVASAAMAG---- 410  
PA\_MrpA IINHATFKASLFMAAG-IIDHETG--SRDMRLINGMWKYLPHATAVLAIVASLAMAG---- 381  
VC\_MrpA IFAHGFYKAALFMVVG-NIDKATG--TREREKLGKLVLLSLIAAVIAALSMSKSG---- 368  
EC\_NuoM MIAHGLSAAGFLILCG-QLYERIH--TRDMRMGGGLWSKMKWLPALSLFFAVATLG---- 397  
RC\_NuoM MLSHGFFISGALFLCVG-VIYDRMH--TREIAAYGGLVNRMPAYALIFMFFMTAMNVG---- 396  
EC\_NuoL LMTHAFFKALLFLASGSVILACHH--EONIFKMGGLRKSIPLVYLCFLVGAALS---- 387  
RC\_NuoL LLTHAFFKAMFLGAGSVIHAMHH--EODMRNYGGLRKKIPPTFAIMMIGTLAITGVGIP 401  
EC\_NuoN LAGYLFSSSLGAFGVVSLMSSPYRGPDADSLFSYRGLFWRHPILAAVMTVMMLSLAG---- 385  
RC\_NuoN MTIYIVMNVGTFFAFILSMERDQKPVTEIAALNMLSKTDPVKAFALLVLLFSLAG---- 380

o o TMS-13

BP\_MrpA -----LPPFNGFLSKEMFFTALLRATMNAFNMETFGLIIVVLLAWIASVTFELYCLI 451  
BH\_MrpA -----LPPFNGFLSKEMFFSGVVTATTLGIFNMETWGLFPPVLAWVASVTFVYCAIM 452  
BS\_MrpA -----LPPFNGFLSKEMFFTSMLRVTDFLNFVQVWGLFPLFAWIGSVFTFIYSMKL 448  
SA\_MnhA -----VPPFNGFLSKESFLETTFTASQANLFSVDTLGVLFPYIIGVGSVFTFVYSIKF 449  
SM\_PhaA1 -----VPLLNGFLSKEMFFAEAEIETHLVNPLD----TVTPYVATIAGMFAVYTSLRF 458  
PA\_MrpA -----VPLLNGFLSKEMFFGETLSQNLGGSFN----WLVPVAVATLAVGVSVAYSLSRF 429  
VC\_MrpA -----VAPMLGLSKKEYMYKSSVESGIA----WISLVLLINALMVALAL 411  
EC\_NuoM -----MPGTGNFVGFEMILFGSFQVVPV----ITVISTFGLVFAVSVYSLAM 439  
RC\_NuoM -----LPGTSGFVGFETLLGLFQVNTW----VALFATSQVILSAAYALLW 438  
EC\_NuoL -----ALPLVVTAGFFSKDEILLAGAMANGHI-----NLMVAGLVGAFMSTLYTFRM 432  
RC\_NuoL FFSIGGVVPGFAGYLSKDAIIEAFASGNG-----FAFYVLAAGMSTFYSWRLL 451  
EC\_NuoN -----IPMTLGFIGKFYVLAAGVQAHW-----WLVGAVVGSAGLYYYLVRV 428  
RC\_NuoN -----VPPMLGFFAKFAVIKAAIGAGFV-----WVPVAAVVASVIGAFYYLRI 423

i i TMS-14

BP\_MrpA FFKTFTGKFK--PENYDVKVHEAPIGMLISPVLIGSLVIVGFFFPNLA 509  
BH\_MrpA FFRFTFTGEFK--KENYDVHVHEAPMGMLISPVILGSLVIVIFGLFPNLLTYTIEPAVTAI 510  
BS\_MrpA LFKTFRGNYO--PEOLEKQAEHPVGLVPPVILVALAVSLFFFPNLSLIEPAMNSI 506  
SA\_MnhA IMHIFFGQYK--PEQLPKKAHEVSLMLLSPAILATLVIIVFGLFPGILNLSIEPATSSI 507  
SM\_PhaA1 IHGVFFGRPP--ADLPRKP-HEPPRWRMRAPLDFLVLACLIVVGIIPAQITIGPFLHTAVLSV 515  
PA\_MrpA IHDVFFNGEP--ARLPKFPPEPPRYMYKVPVEILVFLCCLLVGMLPAYTVAPLLAAASAS 487  
VC\_MrpA LYKPFGGQATKESESHPPKAEIQKSLWLPAMGLAIASFLPLPVFALDWINQHLVIPAUMA 471  
EC\_NuoM LHRAYFGKAKSQIASQELP--GMSLRELFMILLLVLLVLLGFPY 482  
RC\_NuoM YRRVVFVGLVKEKSLKTIIS--DMTTRKAIAPLVAAMTLLLVGVYP 480  
EC\_NuoL IFIVFVHGKEQ-----IHAAVVK-VTHSLPLIVLLILSTFVVALIVPPLQG 477  
RC\_NuoL IFLTFYGEARG--DHHKHDHAEVSPAVMLAPLALLAVGSLVAGMVVYHSFFGDKVASFFNL 510  
EC\_NuoN AVSLYLHAPF--QPGRDAPSNWQYSAAGIIVVLLISALLVVLVGVWP 471  
RC\_NuoN VYFMYFGEKS-----APLDGRMPALQFAFLVLAAVAMLGAIN 461

o i TMS-15

BP\_MrpA L-PTVLADGELFHVNIYMWGHGNAELFMTMGVVAAGIILFLMMKNWAKAAFYMK---ERD 565  
BH\_MrpA LGADVFGGGE---ANIYLVHGFNPELFMTIAVVAFGLIFMNMKKWQOTAFYLR---ERD 564  
BS\_MrpA Y-PTLTDGHEKHFVHISQWGHVTELEMTAGIVVIGTIGYLSLNKWKGIYKFLP---SKL 562  
SA\_MnhA N-HTLVIDDVE---FHMFGHGLTAPFLSTLVIYILGILIVTFYSYVWVLLQROP---GKL 558  
SM\_PhaA1 L-REGTPDYS---LSVWHGWNIPLIMSFVALSGGIGLYFLMRSYLATAVEGPPVFRLL 569  
PA\_MrpA L-GGOLPEYS---LAIWHGFNPLLMSVVALVGGVLYVYLRKPLFNWYAGLPEVDKAL 541  
VC\_MrpA MDPNSVQPAA-----KLWQGFNIPLALSIGITLVLGGVLYLNYATLVTWLTRLV---KPL 522  
EC\_NuoM -----  
RC\_NuoM -----VLPQTTELAHGSMLT----- 492  
EC\_NuoL PAAAHEGEAHG-----TEHATEGHVPEAAMTAEAAHEAAMAGTMAMAEPAAEHAVAKAPQG 565  
RC\_NuoL -----  
EC\_NuoN -----  
RC\_NuoN -----

i i TMS-16

BP\_MrpA PLNWFYDS--SLSGVITGSQFVTRIQMTGLLRDIFAYMIIVFMILLLLGYTMFXYDAFAIDTT 624  
BH\_MrpA PLNRVYDS--SLDWLIKGSQGITRVQYMTGMLRDYFAYMCFVMILLFGYTMVRYNAFADITV 623  
BS\_MrpA LTNRLYDK--LLTMMEKGSYRVTQYMTGFLRDYLLYIFAGFIILIGGFAIKYGFSAFKTE 621  
SA\_MnhA TFNYWYNR--SANVIPNYSKMTNSYVTDYSRNNLVIIIFGALILLT--FVTFVSPFNINPK 616  
SM\_PhaA1 QGQIFERVLVTLVSWKWARWLEQRLLQTRRLQPMR--LLVFLALAAAGASPLLLGNFLELPLP 628  
PA\_MrpA VFEQQVQR--VVALAARLTAWLENGSLQRYLAWLLGAALVVVAVELAPLARLTGSRGLTP-- 599  
VC\_MrpA PKAEQMFDAVLAAYLATLASWQTMQLQQRSSGYMLLFFAVLALILIIYQPLPLP--ATFSA 580  
EC\_NuoM -----  
RC\_NuoM -----  
EC\_NuoL -----LEITSGVAVVVGILLAAWLWLGKRTLVTSIANSAPGRLLG 532  
RC\_NuoL AIFMAETNHVHDAHGVPDVKLSPPFGAMVTGFFFALWYIGDKPLPGR TARALPG--LY 623  
EC\_NuoN -----  
RC\_NuoN -----

o TMS-17 i i TMS-18 o o

BP\_MrpA NVTEIA-PYIWWITIVFIVATLSIPFINKR-IHAVVVVGVIGELLALLFVFRAPDLAL 682  
BH\_MrpA NVSVIS-PYMWVLTIVFISTLAIPFINHR-ITAIIVGVIGFLLALFFVIFRAPDLALT 681  
BS\_MrpA GMACKIG-VYEIILTLVMI SATVATVFAFSR-LTAIIALGVVGYTLALFFVIFRAPDLALT 679  
SA\_MnhA DVSPIDR-IFEVCIVILLLSAAFLILFAKSR-LFSIIMLSAVGYAVSVLFIFFKAPDLAT 674  
SM\_PhaA1 VIRGIDPAFALLWAIGIACIAGSAYQAKFHRLASLVLLGGAGLVTCITFVWLSAPDLAVT 688  
PA\_MrpA -LDGITALGMLVLAFAF--SGLATALFHRMR-LVALLILSVAGLLVALAFARF SAPDLALT 654  
VC\_MrpA SLFDVH-FYEVAIALALIASALLCVLSTSR-LLSVLALGMAGFMTTLVFMIY SAPDVAKT 638  
EC\_NuoM -----QPILDTSHTSAIGNIQQWVNSVTTTR 508  
RC\_NuoM -----SLVTDLIGPSVAHLVQNYHADLGLTA 506  
EC\_NuoL TWWYNAGWFDWLYDKVFKPFLGIAWLLKRD---PLNSMMN-IPAVLSRFAGKGLLSE 587  
RC\_NuoL RFLLNKWFYDFELDFLLFVNPAKSLGRKLVKGGDGAVIDGAINGLALGWIPFFTRVAGRIQ 683  
EC\_NuoN -----QPLISIVRLAMPLM----- 425  
RC\_NuoN -----MAGVEGAAQAAAAASLVN----- 478

o i i TMS-19 TMS-20 o

BP\_MrpA QLLIETVTVLLMLAFYHLPELRKEE-FKPRFNVLNLIISIGVGFITAIALLSSALGNE 741  
BH\_MrpA QLLVETVTVLFLMFAFYHLPELRKEE-FTPRFNLVNLFIISIGVGLVTLIALSSALGNE 740  
BS\_MrpA QLVLETISVALFLLCFYHLPKLRKLT-KTRTFRMTNFIISLGVGVIVTLGGIASSSQRTK 738  
SA\_MnhA QFVVESISTALFLLCFYHLPNLNRYN-EKRSFQLTNALIAAGVGLSVIIIGLIAYG--N 730

SM\_PhaA1 QLLVEIVTTVLILLGLRWLPKRIEFP-VAAKTSRSGSA----- 725  
 PA\_MrpA QLSVEVVTMVLMLALYFLPSRTPAE-SSSLRGLRDVALAGGVGMLVALLAYAVLT---- 709  
 VC\_MrpA LLLVETLMVVFVLLMRHPYLSVARHVSARRTLNAVIASVIGASVTLILLNITAHF-- 696  
 EC\_NuoM P----- 509  
 RC\_NuoM QATAGN----- 512  
 EC\_NuoL NGYLRWYVASMSIGAVVVLALLMVLR----- 613  
 RC\_NuoL SGYLFHYAFAMVLGIVALMFVWVRTGGMN----- 712  
 EC\_NuoN -----  
 RC\_NuoN -----

BP\_MrpA AGIEPISQFFIENSKELAGGYNMVNVILVDFRGLD**TMLEVLVLGIAALGVIALIK**LRMTG 801  
 BH\_MrpA AGLGTISEYFIENSKELAGGYNMVNVILVDFRGLD**TMLEVLVLGIAALGVIA**MIKLRMTG 800  
 BS\_MrpA D---SIASFFVKHSHDLGGGDNVVNVILVDFRGFDTMFEITVLTIAALGIYSMIKTKVKE 795  
 SA\_MnhA RHFESISKFYQEHVYDLAHGKNMVNVILVDFRGMDDTLFESSVLGIAGLAVYTMIKLRKR 790  
 SM\_PhaA1 -----  
 PA\_MrpA RPYESIAGFFVENSVSAGGGYNNVNVILVDFRGFDLGEISVLAIAAGVGIYAMLAGFALH 769  
 VC\_MrpA -IDTTLSDYFAQQSVPGGHGRNIVNVILVDFRAFDTLGEIVVIMASLVAISLLPKRTEQ 755  
 EC\_NuoM -----  
 RC\_NuoM -----  
 EC\_NuoL -----  
 RC\_NuoL -----  
 EC\_NuoN -----  
 RC\_NuoN -----

BP\_MrpA REDV----- 805  
 BH\_MrpA REDV----- 804  
 BS\_MrpA EGKSGE----- 801  
 SA\_MnhA QTQGNEVKNHE----- 801  
 SM\_PhaA1 -----  
 PA\_MrpA KPTCDPQGRNWAHAKHPLILETLRSVLLPLALLISVFIIFLRGHNLPGGGFITAGLVTAIAL 829  
 VC\_MrpA PQKIHSILIFATT-----AHIVTALMLMFSLYLLLRGHNAPGGGFITAGLIAVIGF 804  
 EC\_NuoM -----  
 RC\_NuoM -----  
 EC\_NuoL -----  
 RC\_NuoL -----  
 EC\_NuoN -----  
 RC\_NuoN -----

BP\_MrpA -----  
 BH\_MrpA -----  
 BS\_MrpA -----  
 SA\_MnhA -----  
 SM\_PhaA1 -----  
 PA\_MrpA VLQYIASGSQWVEQRLPLNYAAMAGAGVLIAGLTGLGSWLFYGPFLTSFAGHFELPLIGE 889  
 VC\_MrpA SLLLFAESPQYVRDRLHFSPLNIALFGILLSFMAGAMSVAVGLPFLTGLWWKEILPLG-- 862  
 EC\_NuoM -----  
 RC\_NuoM -----  
 EC\_NuoL -----  
 RC\_NuoL -----  
 EC\_NuoN -----  
 RC\_NuoN -----

BP\_MrpA -----  
 BH\_MrpA -----  
 BS\_MrpA -----  
 SA\_MnhA -----  
 SM\_PhaA1 -----  
 PA\_MrpA IELATAMLFDLGVYLTVVGAALLILSYLGLKLSLMPEPVAQEEAL 933  
 VC\_MrpA ---TPLLFDVGIYLAIIGGVMSMLLRVKEELD--- 891  
 EC\_NuoM -----  
 RC\_NuoM -----  
 EC\_NuoL -----  
 RC\_NuoL -----  
 EC\_NuoN -----  
 RC\_NuoN -----

B.

BP\_MrpB -----MKN----- 3  
 BH\_MrpB -----MKNNS----- 5  
 BS\_MrpB -----MNE----- 3  
 SA\_MnhB -----MKE----- 3  
 VC\_MrpA FAQOSVPGGHGRNIVNVILVDFRAFDTLGEIVVIMASLVAISLLPKRTEQP----- 756  
 SM\_PhaB FLERAYREGGNTNVNVILVDFRGFDLGEIAVLCIVALTVFALLRFRPQSDSLEAPEQ 79  
 PA\_MrpA FVENSVSAGGGYNNVNVILVDFRGFDLGEISVLAIAAGVGIYAMLAGFALHKPTCDPQGR 778

BP\_MrpB -----LKSND**VLLHPLTRVVTFIILAFSVYLFFAGHNNP**GGGFIGG 44  
 BH\_MrpB -----FKSNEVMLHTVTRIVTFIILSFSVYLFFAGHND**P**GGGFIGG 46  
 BS\_MrpB -----QKTNDLILQATKLVSFIIILFSFYLFSLGHNA**P**GGGFVGG 44  
 SA\_MnhB -----NDVVLRTVTKLVVFILLTFGFYVFFAGHNN**P**GGGFIGG 41  
 VC\_MrpA -----QKIHSLIFATAHIVTALMLMFSLYLLLRGHN**A**PGGGFIGA 797  
 SM\_PhaB QKVQNAFDDDDPDRAAGDSVAEYLFIPAVIMRWMFPVTGMLAAFLLR**G**HL**P**GGGF**A**AG 139  
 PA\_MrpA NWAH-----AKHPLILETLRSVLLPLALLISVFIIFLR**G**HL**P**GGGF**I**AG 822

BP\_MrpB LMTASALLMYL**G**EDMRSIKKAIPFDFTK**N**IAFGLLLIAIF**T**GFGLLV**G**DEY**I**TOYFEYY 104  
 BH\_MrpB LMTASAFLLMYLAFDMDMSMKKALPNFTALIAIGLLLAIF**T**GVSSMLAGDPFL**T**OYFRYF 106  
 BS\_MrpB LITSSIVLLLLAYDLKTVRSLLPNFIVYAGAGLLAVLTCVGSFVFGAPFL**T**H**T**FGYF 104  
 SA\_MnhB LIFSSAFILMFLAFNVVEEVLLESLPIDFRILMIIGALVSSITAIIPMFFGKPF**L**SQYET**T**W 101  
 VC\_MrpA LIAVIGFSLLLFAESPQYVRDRLHFSPLNIALFGILLSFMAGAMSVAVGLPFLTGLWWKE 857  
 SM\_PhaB IAMSIGFILQYMSGGTRWVEERLRIHPLRWMSIGLLVATATGVGSWFFGYPFL**T**SHAQYA 199  
 PA\_MrpA LVTALVLQYIASGSQWVEQRLPLNYAAMAGAGVLIAGLTGLGSWLFYGPFLTSFAGHF 882

BP\_MrpB QIPILGETEL**T**AL**P**FDLGIYLVVIGIAL**T**II**L**TI**A**EDDM----- 144  
 BH\_MrpB QLPILGETEL**T**AL**P**FDLGIYLVVIGIAL**T**II**L**TI**A**EDDA----- 146  
 BS\_MrpB QLPILGKTELATATIFDLGVYLVVVGITMT**I**IQ**T**IGEEE----- 143  
 SA\_MnhB ILPILGQIHVSTITIFELGILFSVVGIVITV**M**LSLGGRS----- 141  
 VC\_MrpA ILPLG-----TPLLFDVGIYLAIIGGVMSMLLRVKEELD----- 891  
 SM\_PhaB SLPVVGKFPPLASAILFDLGVFSLVLGATVLLILIALAHQSVRAPRAHAKAARS**D**KEAVR 257



SA\_MnhD KVGVIYAIARTLSLFFSDNV---SFSHYVILFLALLTIIIFGCVGAVAYANIKKIILYNVM 309  
VC\_MrpD KVGVIYALLRVFTLVFPLDG----SGWQPVLLGIAALTMLTGVLGAASQYDIKKILSFHII 305  
SM\_PhaD KVGVIYVIRLHLLVFGTAAGASSGFGQEWLVVTGCMILTAFGGIGVLSAQAMGRLAGYSVL 326  
PA\_MrpD KVGVIYILRVYTLVFGDAAGELANLAQAWLWPLALATLGLGAIGALAARTLQGLLAYLVV 307  
EC\_NuoL TAGVYLIARTHG--LFLMT---PEVLHLVGI VAVTLLLAGFAALVOTDIKRVLAYSTM 313  
RC\_NuoL TAGVFLVCRMSP--LFEYA---PEAKMMVVYVAVTARFAATVGLVONDIKRVIAYSTC 322  
EC\_NuoM KTAAYGLLRFSLPLFPNAS---AEFAPIAMWLVGIVGIFYGAWMAFAOTDIKRLIAYTSV 320  
RC\_NuoM KMGGYGFLRFSLPMFPVGA---ETMTTFVFLSVAIVYVTSLVALAQEDMKKLIAYSSV 319  
EC\_NuoN IAFVGVVRLFLYAPVGDSD---EAIRVVLAIIFASIIIFGNLMALSQTNIKRLLGYSSI 303  
RC\_NuoN LAAMALIARVVHDAFGQVP---GEWQQLAALALASMYLGAIAGIGQRDIKRLMAYSSI 302

\* TMS-10 o TMS-11 i

BP\_MrpD SOVGYMVMGLGIYTO--LA IAGAIYYIAHHIIVKKAALFLFAGATORITG----- 352  
BH\_MrpD SOVGYMVMGLGIFTP--LALAGAIYYIAHHIIVKKAALFLFAGATEKITG----- 352  
BS\_MrpD TAVGVILFVAVHTP--ASTIQGAIYYLIHDMLVKGFMLAGTLIALTG----- 352  
SA\_MnhD IAVGVILVGVAMMTE--SGMIGAIYYTLHDMLVKLLALFLLIGIMIKITG----- 356  
VC\_MrpD SQIGYIMIMGLAIYTP--LAITGAIYFVIHHLVVKGNLFLIGGLIGRKYG----- 352  
SM\_PhaD VSSGTLAAVGLGHD--GMLAGALFYVLSSTLTIGAFFLLIELVERGRDAGADVLAVTME 384  
PA\_MrpD VSAGTLLAGVALGSE--RALAASLYLHLHSTWIAGGLFLLADLVARQR----- 353  
EC\_NuoL SQIGYMFALALGVQ---AWDAAI FHLMTTHAFFKALLFLASGSVILACHH----- 358  
RC\_NuoL SQLGYMFVAAGSG---VYSVAMFHLTHAFFKAMFLGAGSVIHAMHH----- 367  
EC\_NuoM SHMGFVLIAYTGSQ--LAYQGAVIQMI AHGLSAAGLFI LCG-OLYERIH----- 367  
RC\_NuoM AHMGYVVTMGI FAANQ--QGV DGAIFOMLSHGFI SGALFLCVG-VIYDRMH----- 366  
EC\_NuoN SHLGYLLVALIALQ TGE MSMEAVGVYLAGYLFSSLGAFGVVSLMSSPYRG----- 353  
RC\_NuoN SHMGFGLGLAAGTA--AGVESMLLYMTIYIVMNVGTFAF ILSMERD GKP----- 350

\* i TMS-12 o

BP\_MrpD -----TDLKKMGGLLKH*P*WLAWMFFISAIISLAG-----IPPLSGF SKF 393  
BH\_MrpD -----TTELKKMGGLLKH*P*WLPWLFISAIISLAG-----IPPLSGFFSKF 393  
BS\_MrpD -----TASLHKMGGLIKRYPVLGWMFFISAIISLAG-----IPPLSGFVKGK 393  
SA\_MnhD -----TADLRQFGGLIKRYPVLGWSFFIAALS LAG-----IPPLSGFYGKF 397  
VC\_MrpD -----TTQLTQLGGVYRAMPWLTFGFLAAAFSLAG-----FPPLSGFWGKF 393  
SM\_PhaD AYGDFFDEDEEEVGAAPGTMAVGLGFCCLCALLLAG-----LPPLSGFIAKF 433  
PA\_MrpD -----GDKAGDLVQGPALQNPRLGGAFFIGAI AVAG-----LPPLSGFFGKV 396  
EC\_NuoL -----EQNIFKMGGLRKSIPLVLYCFLVGGAALS-----ALPLVTAGFFVD 400  
RC\_NuoL -----EQDMRNYGGLRKKIPFTFAIMMIGTLAITGVGIPFFSIGGVVPGFAGYLSKD 419  
EC\_NuoM -----TRDMRMMGGLWSKMKWLPALS LFFAVATLG-----MPGTGNFVGEF 408  
RC\_NuoM -----TREIAAYGGLVNRMPAYALIFMFFTMANVG-----LPGTSGFVGEF 407  
EC\_NuoN -----PDADSLFSYRGLFWHRPILAAVMTVMMLSLAG-----IPMTLGFIGKF 396  
RC\_NuoN -----VTEIAALNMLSKTDPVKAFALLVLLFSLAG-----VPPMLGFFAKF 391

o TMS-13 i

BP\_MrpD ALILA-----AFLNENYIIAAVALAVGLLTLFSMMKIFLYA FWGEO--KHTEE 439  
BH\_MrpD ALILA-----GFEEGRYVIVTVALIVGLLTLFSMMKIFIYAFWGEQ--KHTEQ 439  
BS\_MrpD KIAEG-----GFAEGEFTISMLILLSSLLVLYSVLRIFIHAFWGE--KETPK 439  
SA\_MnhD FIVQS-----TFERGFYLVSGVIVLLSSLVVLYSVIRIFLQGFQGP--KGYDL 443  
VC\_MrpD LVIIKA-----SLAAELYWLAAILLVGLLTI FSMTKIWNNEVFWKDAPAALPOET 442  
SM\_PhaD ALISGLFDMPAAELATAMSAADWTYVTL LLSGLAAMIAMNIRIGIRTFWASI---EGTI 489  
PA\_MrpD MLLQ-----SVAPGSQALALWSVVLGSGLVALVALSRAGSTLFWRTG---HTVL 442  
EC\_NuoL EILAG-----AMANGHINLMVAGLVGAFMTSLYTFRMI FIVFHGKEQ---IHA 445  
RC\_NuoL AIIES-----AFASGNGFAYFVYLVAAAGMTSFSYWRLLIFLTFYGEARGDHHKH 468  
EC\_NuoM MILFG-----SFQVVP-VITVISTFGLVFASVYSLAMLHRAVYFGKAKSQAIS 456  
RC\_NuoM LTLFG-----IFQVNT-VWALFATSGVILSAAAYLWLYRRVVFG-ELVKESLKT 454  
EC\_NuoN YVLAVG-----VQAHLWLVGAVVVGSAIGLYYLRVAVSLYLHAP- QPGRDA 444  
RC\_NuoN AVIKA-----AIGAGFVWVPAVAVVASVIGAFY YLRIVYFMYFGEK-----SA 434

i TMS-14

BP\_MrpD QANFKVVGKLLLPIVPLVALTIIILGFAAEP----- 468  
BH\_MrpD QAKMPIGKLLLPIAPLVLTIVLGFGAEP----- 468  
BS\_MrpD PNHRTAKGLLYPAAISLLL SLLFGLGTEW----- 468  
SA\_MnhD NNKVDVKYLTIIAIVAVVITVLYGLSADY----- 472  
VC\_MrpD LARSTLGLYALPILVLTLSLVIGLAAQP----- 471  
SM\_PhaD PRVVVIE--ITPVVLLGACIFLSQLAGP----- 516  
PA\_MrpD GSAELDHGRLFACILLLSAGPLL VFAAKP----- 471  
EC\_NuoL HAVKG-VTHSLPLIVLLILSTFVAGALIVPPLQG----- 477  
RC\_NuoL HAHESPAVMLAPLALLAVGSLVAGM VVYHSFFGDKVASFFNLPAAAHGEAHGTEHATEGH 528  
EC\_NuoM LPGMS-LRELFMILLVLLVLLGFYPOP----- 484  
RC\_NuoM ISDMT-TREKAIFAPLVAMTLLLGVPSP----- 482  
EC\_NuoN PSNWOYSAGGIVVLI SALLVLLVGLVWPQP----- 473  
RC\_NuoN PLDGRMPALQFAFLVLA AVAMLGAINMAG----- 464

BP\_MrpD -----I 469  
BH\_MrpD -----I 469  
BS\_MrpD -----V 469  
SA\_MnhD -----L 473  
VC\_MrpD -----F 472  
SM\_PhaD -----A 517  
PA\_MrpD -----L 472  
EC\_NuoL -----LEI 495  
RC\_NuoL VPEAAMTAEAAHEAAMAGTMAMAEPAAEHAVAKAPQGAIFMAETNHVIHDAHGVDPDWKL 588  
EC\_NuoM -----I 485  
RC\_NuoM -----V 483  
EC\_NuoN -----L 474  
RC\_NuoN -----V 465

o

BP\_MrpD FOYSLOVADQILDPTIYIESVLKE----- 493  
BH\_MrpD FOYSLOVADELLNPSVYIESVLKE----- 493  
BS\_MrpD SFYVDQAAETLLNPEKYIEAVLKE----- 493  
SA\_MnhD YPMVKAGAE TFYNPSTYVKAVLGGK----- 498  
VC\_MrpD YQFATLAAEQLLTPTAYIHAVLGGSK----- 498  
SM\_PhaD MRYMQATADDLLAPLTHSERVLSAPRAGSQ----- 547  
PA\_MrpD LAYVQATAAQ LHD-LDLYRQIITRGGAA----- 499  
EC\_NuoL TSGVVAVVGILLAAWLWLGKRTLVTSIANSAPGRLLGTWWYNWAGFDWLYDKVFKPFLG 555  
RC\_NuoL SPFGAMVTGFFFAWLYYIGDKPLPGR TARALPG--LYRFLLNKWYFDELFDLLFVNPAKS 646  
EC\_NuoM LDTSHSAIGNIQQWFVNSVTTRP----- 509  
RC\_NuoM TDLIGPSVAHLVQNYHADLGT LAQATAGN----- 512  
EC\_NuoN ISIVRLAMPLM----- 485  
RC\_NuoN EGAAQAAAAALVN----- 478

BP\_MrpD -----  
 BH\_MrpD -----  
 BS\_MrpD -----  
 SA\_MnhD -----  
 VC\_MrpD -----  
 SM\_PhaD -----  
 PA\_MrpD -----  
 EC\_NuoL IAWLLKRD --- PLNSMMN-IPAVLSRFAGKGLLSENGYLRWYVASM SIGAVVVLALLM 610  
 RC\_NuoL LGRKLWKGGDGAVIDGAINSLALGWIPPFTRVAGRIQSGYLFHYAFAMVLGIVALMFVVV 706  
 EC\_NuoM -----  
 RC\_NuoM -----  
 EC\_NuoN -----  
 RC\_NuoN -----

BP\_MrpD -----  
 BH\_MrpD -----  
 BS\_MrpD -----  
 SA\_MnhD -----  
 VC\_MrpD -----  
 SM\_PhaD -----  
 PA\_MrpD -----  
 EC\_NuoL VLR--- 613  
 RC\_NuoL RTGGMN 712  
 EC\_NuoM -----  
 RC\_NuoM -----  
 EC\_NuoN -----  
 RC\_NuoN -----

E.

BP\_MrpE ----- o TMS-1 i  
 BH\_MrpE -----MAFOILLNLVIAVIWVNFONSYTAVDFLIGYVVGIFILFVLRFRFRFD 48  
 BS\_MrpE -----MALQILLNLVIAIWMFLQNSFTFADFVGYVVGIGILIALRRFMIFD 48  
 SA\_MnhE -----MASQILLNVFLAFGWMLFNSPSPAAGFITGYILGMLSLFVFRFRFRFD 48  
 VC\_MrpE -----MAVQLVLFNI IAVFWLFTNSYTTNPFVLFGLVYVLLHRLVLPGR 48  
 PA\_MrpE -----MIYLFNLFLATAWMLLNGDYSSLOFLGFFVGFWALRSLQPFGLKT 47  
 SM\_PhaE MISRSLPRLLRVLPHVLSVLLLVWLLVDSFAIGHWLLGAFVLCVPLLTNRLLVGR 60  
 -----MRTWFPYPLLISALLMWSQSVTPGSIVLGLVSVTLAWVTLNLQPAP 51  
 : : : \* : : : \* : : : \* : : : \* : : : \* : : : \* : : : \*

BP\_MrpE i TMS-2 o  
 BH\_MrpE FYMRR IWA I I K L I S L F F K E L I L A N I D V K I V L S P K M N - I O P G I V A V P T K L K T D W E L S L L A 107  
 BS\_MrpE LYFRKVVWAIKLIVLFFKELVLANIDVTKIVLSPKLD-ITPGIVAVPTKLSDWELTLA 107  
 SA\_MnhE FHLWKLISI IKLCFIFIKELYLANVSMKSVLSPKLN-IRPGIFGFKTELTKDWEITMLS 107  
 VC\_MrpE FYVITLYRI IKLVIIFLIELIKANFDVLI I IKPSIK-NEPGFFVYHTDLKDWQIVLLS 107  
 PA\_MrpE TYFRFRFRATITLILYFIYEMVVSVARVAVDVTTPKHL-SDPDIVYVPLDARSDLAITLLA 106  
 SM\_PhaE SQEWHPLLKLLVLMWDILVANIQVARLTLGP IER-LRPAFVEVPIELENDLAISVLV 119  
 SRLHRWSRIAGFILRVVGDVIRSNIAYTLIILRAGRRPVNAGFMTVSLDDLLENALALLA 111  
 : : : \* : : : \* : : : \* : : : \* : : : \* : : : \* : : : \*

BP\_MrpE TMS-3 i  
 BH\_MrpE SLISLTPGTLSD FSDDNKYIYIHAIDVPNKEKMIRDIHDTFERAILEVTK---- 158  
 BS\_MrpE GLISLTPGTLSD FSDDKKYIYIHSIHVPDKEAMIREIHDTFEKAILEVTA---- 158  
 SA\_MnhE LLITLTPGTLVMDISDDRTILYIHAMDIEDAEKAI FDIRESFEKAIQEVSR---- 158  
 VC\_MrpE NLITLTPGTVVLGVSDDRTKIYIHAIDFSTKEQEVESIKTSLEKIVREVGEI--- 159  
 PA\_MrpE NMVSLTPGTLSDVSDRQYLIVHAMFAPEHQAVINDIKNGLEKRILEVTRG--- 158  
 SM\_PhaE SIVSLTPGSVSDLSDDRKTLLVHGLDVPDKAALIAEIKQRYEAPLKEIFPCSLT 174  
 CVVTA TPGTAWLEYDRRQKILLFHVLDIEN-EDLWRKTI TRYAADLKEIFE---- 161  
 : : : \* : : : \* : : : \* : : : \* : : : \* : : : \* : : : \*

F.

BP\_MrpF o TMS-1 I i TMS-2  
 BH\_MrpF -----MFO I I L M I V L V V M S I S L E V C F I R T L I G P T M S D R V A L D T F G I N L I G 46  
 BS\_MrpF -----MFEIVLHVVLVIMSLSLAACFYRTIVGPTMSDRIVALDTFGINLIG 46  
 SA\_MnhF -----MFTLLIQIALGIMVSTFLYVIRVIKPTVDRVVALDAIGINLIA 46  
 VC\_MrpF -----MNHNVIIIVIALIIVISMLAMLIRVVLG PSLADR VVALDAIGLQMA 47  
 PA\_MrpF MVLKNGYWRSLVDNSLPLAIFAYLGLLSLAMAFIRLVLP SLADR VVALDLISFITIG 60  
 SM\_PhaF -----MLAYV I P L C L A L L G L A L L T L A R L V K G P C L P D R A L A L D T L Y V N A I A 46  
 -----MELAVVSVLVAQTMLALAMAFALYRMARG PRAQDR I L G L D T L Y I N A M L 49  
 : : : \* : : : \* : : : \* : : : \* : : : \* : : : \* : : : \*

BP\_MrpF o TMS-3 i  
 BH\_MrpF FIGVIMM QETLAYS EVVLVISILAFIGSIALSKFIER--GVVFDRG---- 91  
 BS\_MrpF FIGIIMILQETIAYAEVILVGLAFVGSIALAKFLER--GTIFDRSRDHR-- 95  
 SA\_MnhF ITALVSILKTS AFLDI ILLGLSFIGTIAFSKFLEK--GEIENDRNR-- 94  
 VC\_MrpF VIALFSILNICYMIVVIMGILAF LGTAVFSKFM DK--GKVI EHDQNH TD 97  
 PA\_MrpF FIVVYSLDSGQOTLLDIALTLGLVAF LGTIAFARFIAKRKGEL----- 103  
 SM\_PhaF LVLVYGIWRSDLFFEAALLI AVLGFVGTVA VAKYMLR--GDIE----- 89  
 MLITFGIRTANTVYFETALI IAVIGFASSIALAKFLMR--GEVIE----- 92  
 : : : \* : : : \* : : : \* : : : \* : : : \* : : : \*

G.

BP\_MrpG i TMS-1 o TMS-2  
 BH\_MrpG -----MTAVE I I S I F V L I G G F L S L L G S I G I I R P D V Y G R L H A A T K S A T L G V I S I M L A 53  
 BS\_MrpG -----MTAVE I I V S L F I L L G A F L S F L A S V G I I R F P D V Y G R I H A A T K S A T L G V I S I M V A 53  
 SA\_MnhG -----MIETAKVVAVF I L L G A L I C L I A S F G V L R L P D V F T R A H A A S K G S T L G V N M I L L G 54  
 VC\_MrpG -----MIKI I L I S L A L I F V I I G A L I S A L A I G L L R L E D V Y S R A H A A G K A S T L G A M S L L F G 55  
 PA\_MrpG -----MSMLAALLV L G T L F T L F A S L G I L R M P D L Y T R M H A A T K A G T A G L S L L L L A 50  
 SM\_PhaG -MTGEPLSLWLE I I V S A F L L L G S A F V L I G A I G L Y R L P D F F M R L H G P T K A T T L G V G G V I V A 59  
 MSHLTDLPWAALLVCGMLVGAATLIGSLGLLRLPDFYARLHPATTATSGGTILLCLA 60  
 : : : \* : : : \* : : : \* : : : \* : : : \* : : : \*

BP\_MrpG i i TMS-3 o  
 BH\_MrpG TFLFFFLV GEFV G K L L T I L F V L T A P V A G M M M G R S A Y R V G V P L W E K S T O D D L K -- K M Y 111  
 BS\_MrpG TFLYLLIEGLFV G K I L F T I L F V L T A P V A G L M I S R S A Y R I G V P L W D O S V O D D L K -- K V Y 111  
 SA\_MnhG VFFYLWV F V G E L S A K I L L G I L F I F I T S P I G G H L I C R A A Y N S G V K L D E R S V O D D Y N G I R N F 114  
 VC\_MrpG TFLYFIATQGFVNMLIVAIIFVLITG P L S S H M I M K A A Y N I K T P Y T K K T K V D E I S ----- 110  
 PA\_MrpG VALCFMPEIG--VISRLVGM L F I F L T A P V A A H L L G K V T Q Q A G Y A F W R N Q D A A K Q K ----- 103  
 SM\_PhaG SLIYFSNRQAGISLHELLISLFLFISA P V S A Y M L A K A A V L ----- Q O L P L E K K T R ----- 109  
 SILCFAVLQSRWVFHEVLI I F F V T V T P V T L M L L G O A T L Y R D R F E E Q Q G V P R K Q K ----- 115  
 : : : \* : : : \* : : : \* : : : \* : : : \* : : : \*

BP\_MrpG EKKMKGSN-- 119  
 BH\_MrpG AKKRQT--- 117  
 BS\_MrpG VIKRKEDSYL 124  
 SA\_MnhG -EDLKDTKL- 118  
 VC\_MrpG -KAQK----- 107

PA\_MrpG  
SM\_PhaG

GKPWEO---- 115  
PAPGEE---- 121  
:

# Figure S2

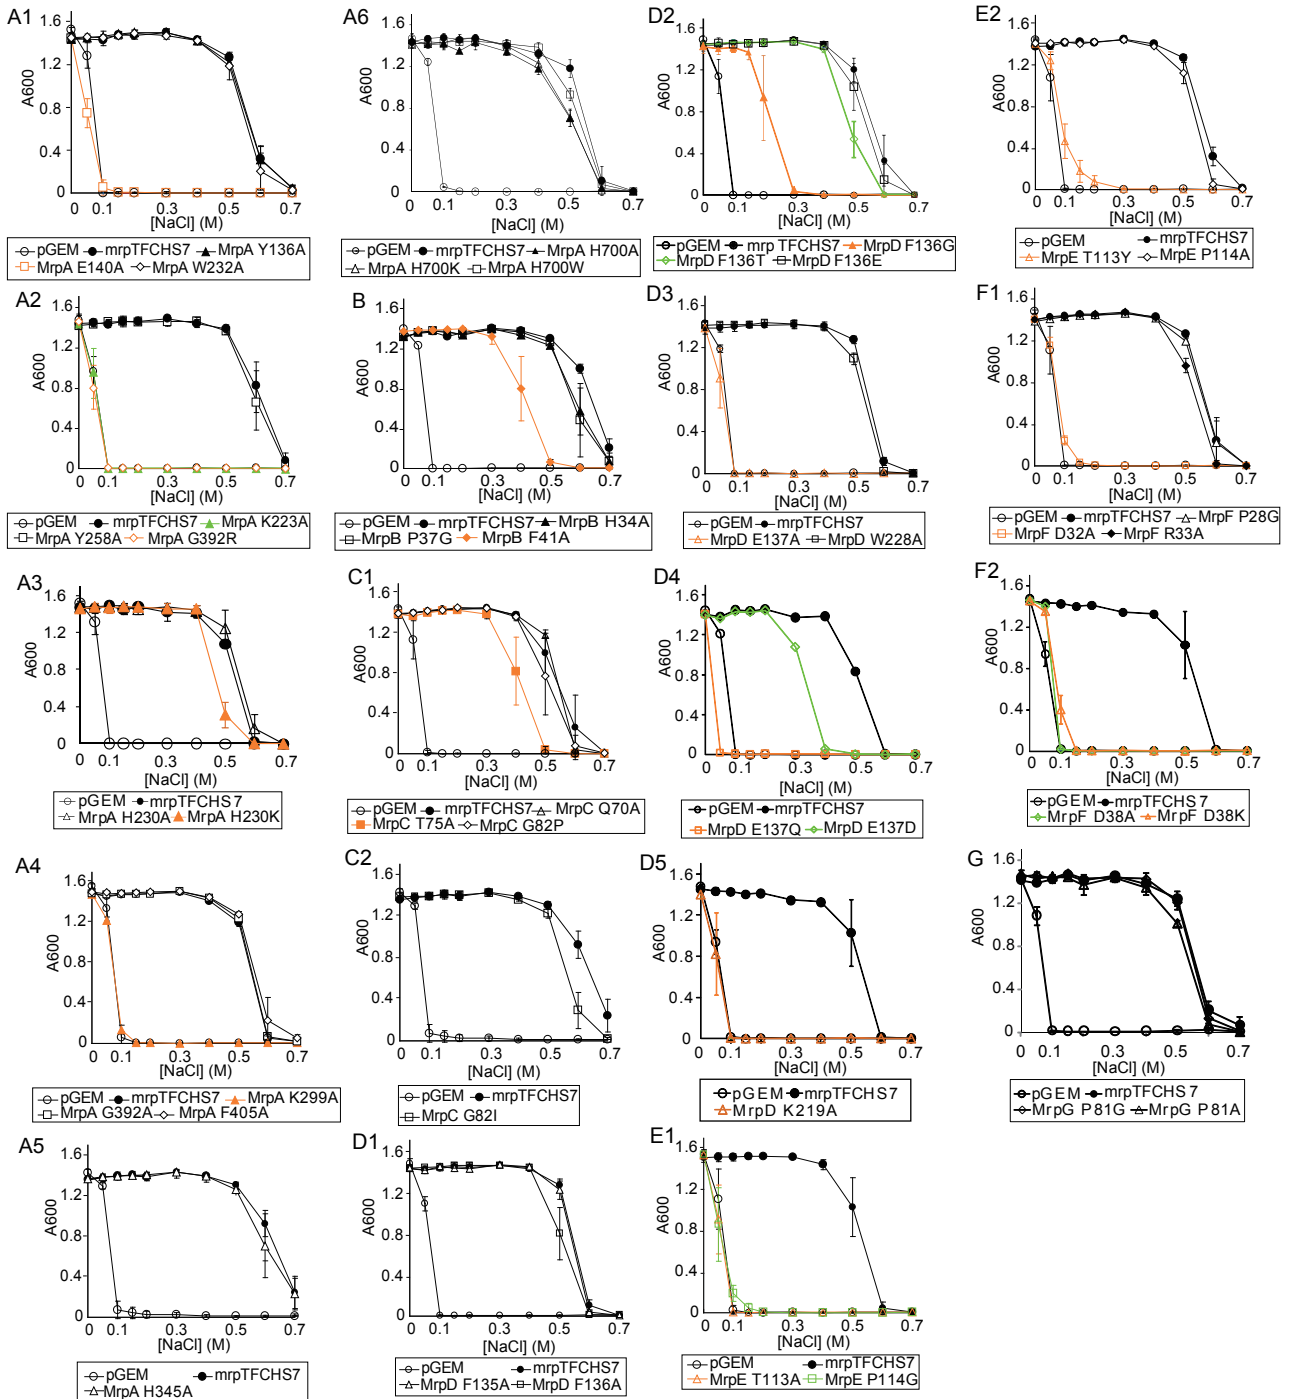

# Figure S3

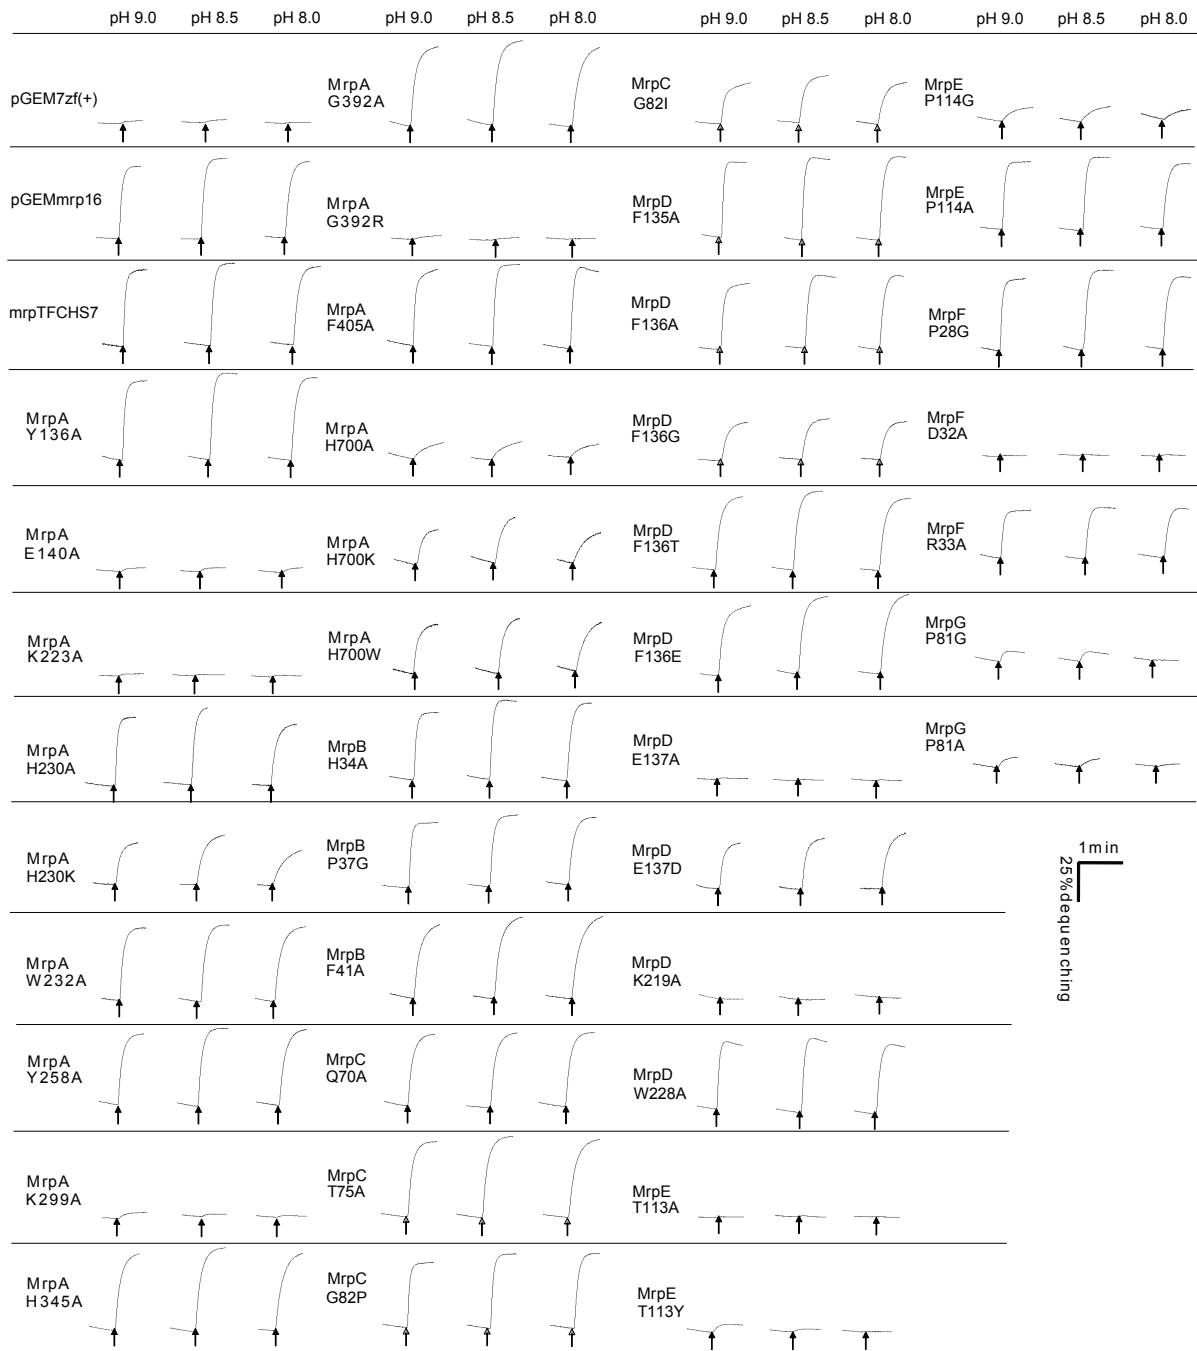



# Figure S4

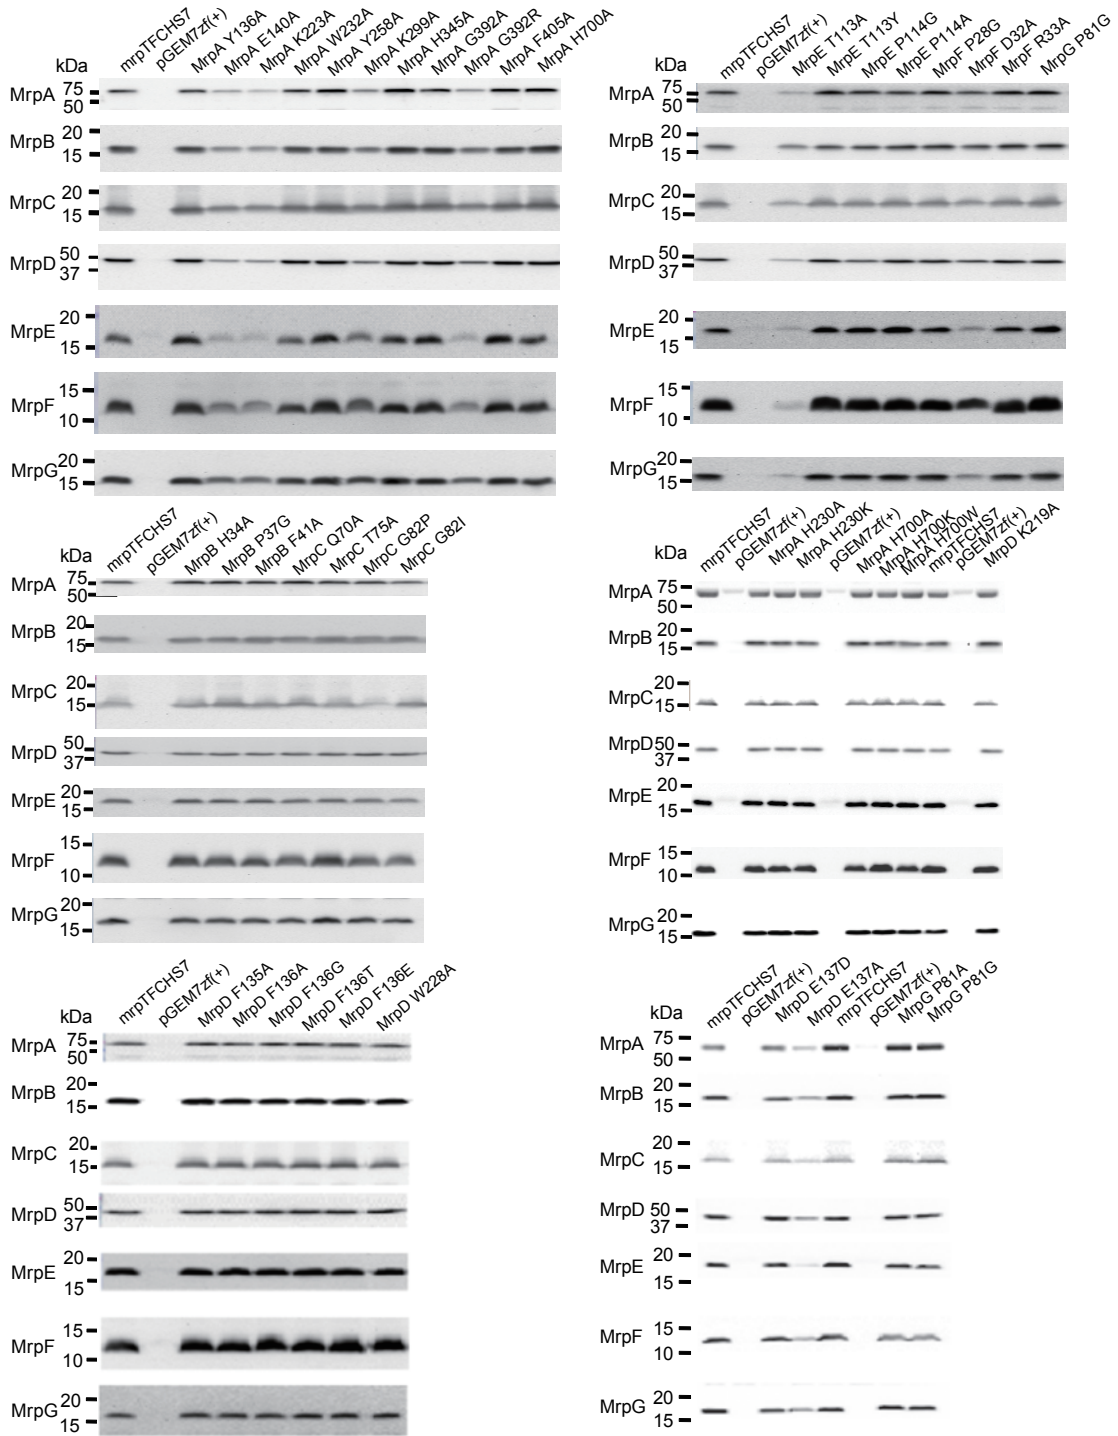

**Figure S5**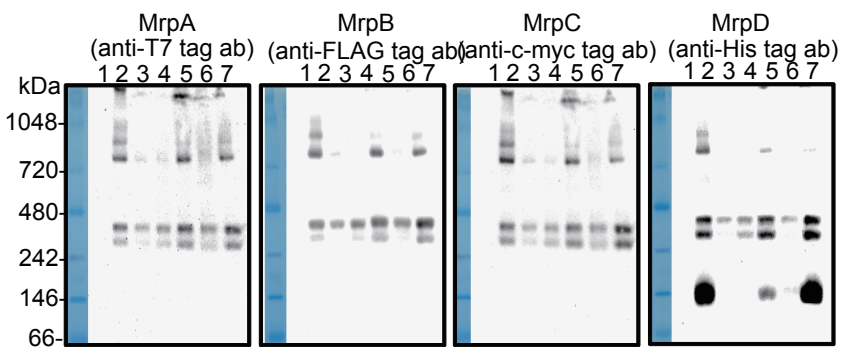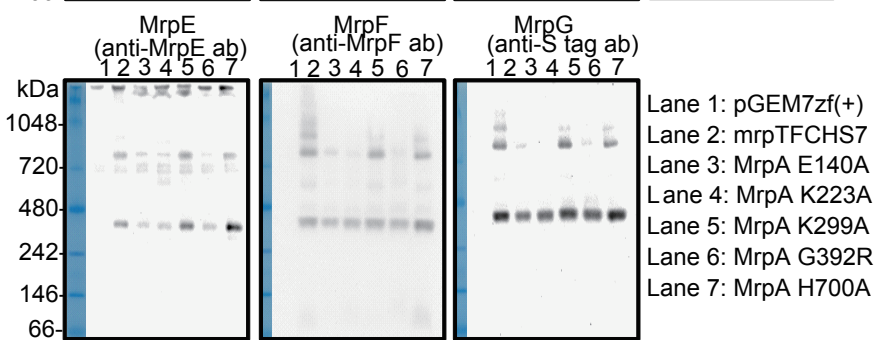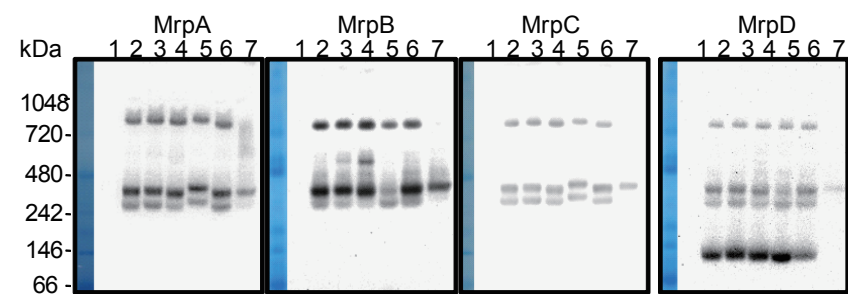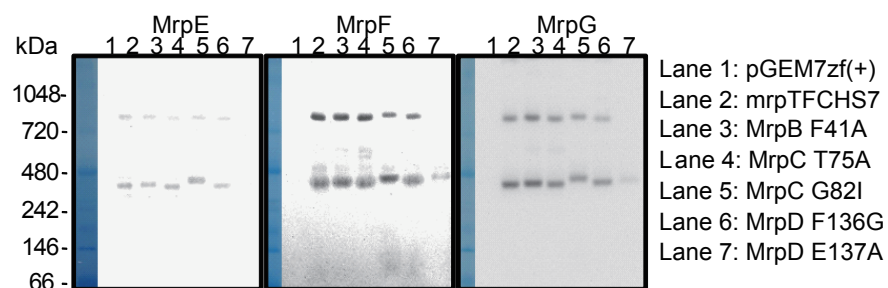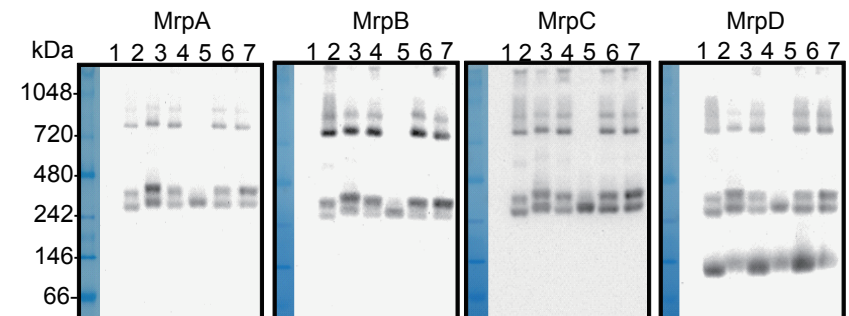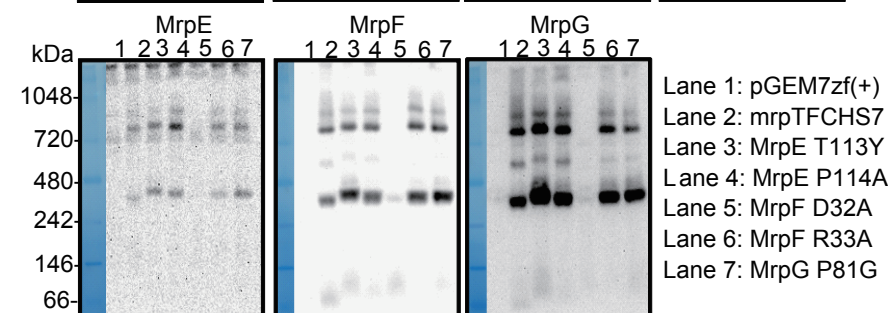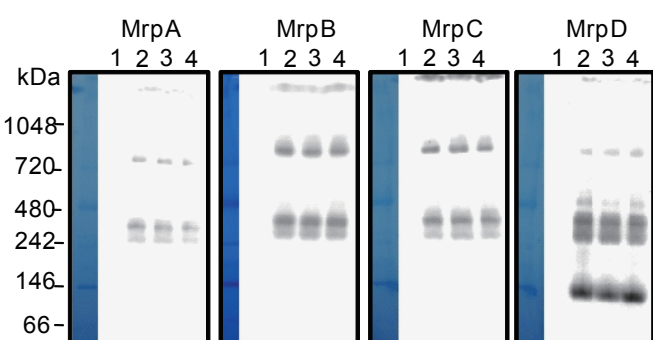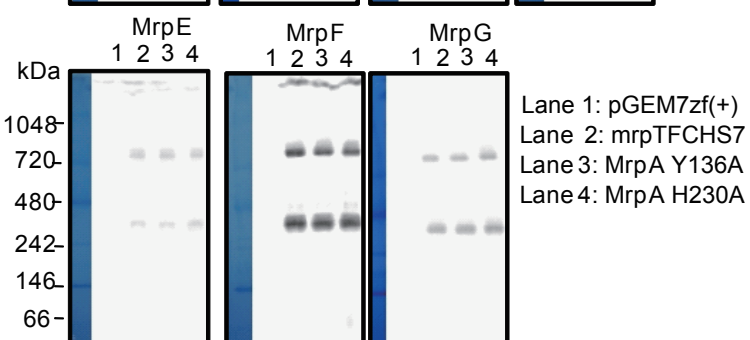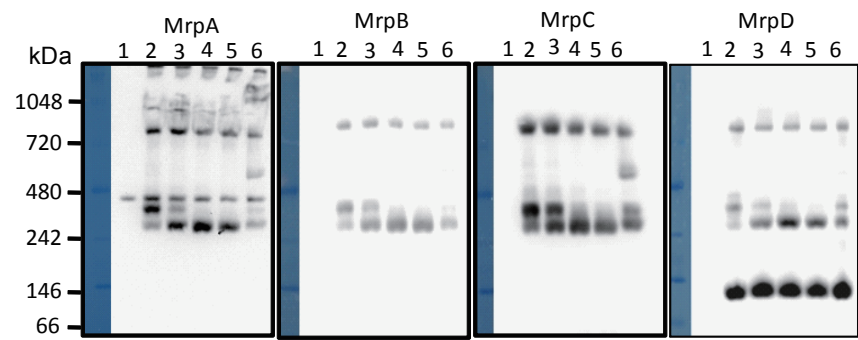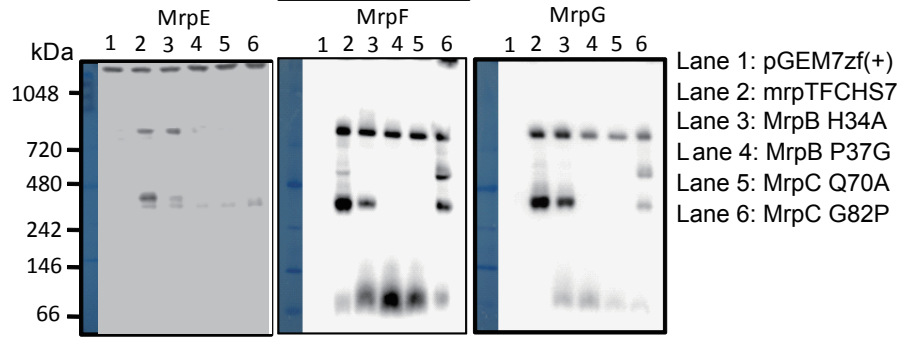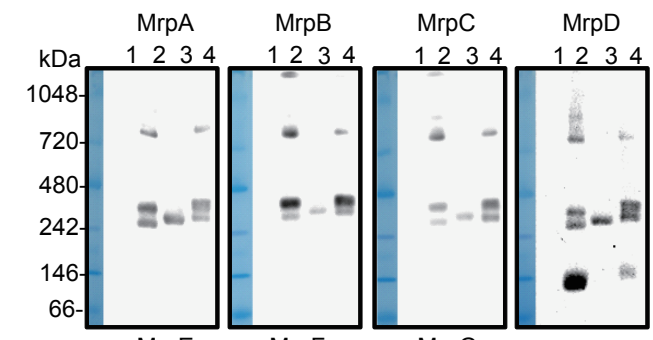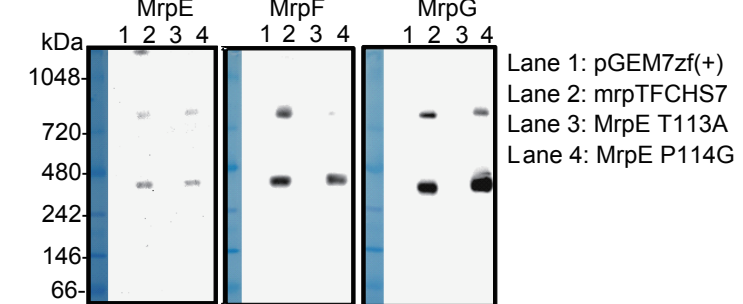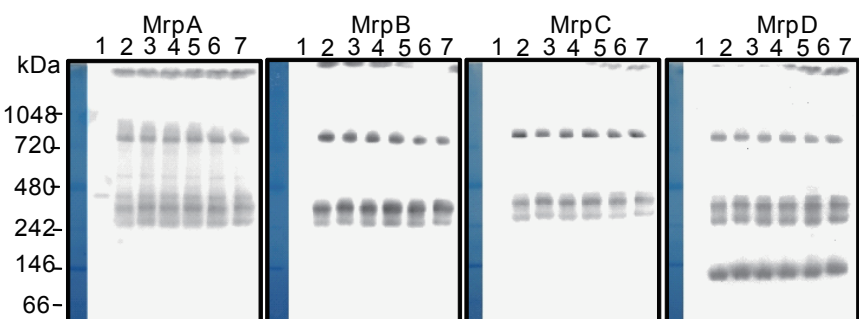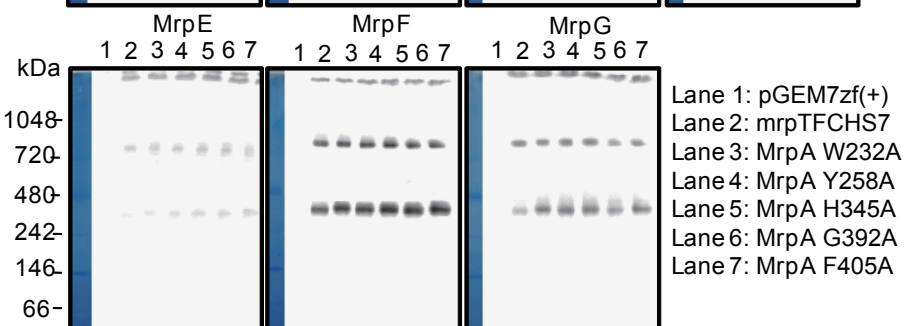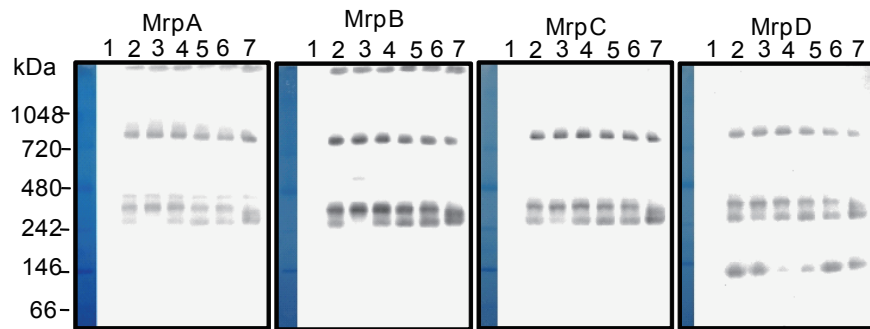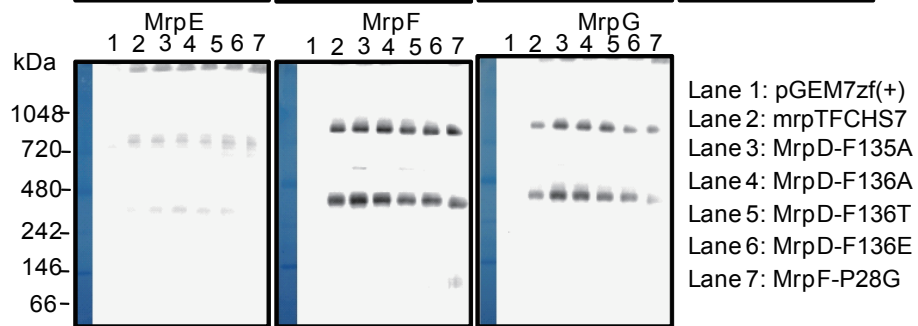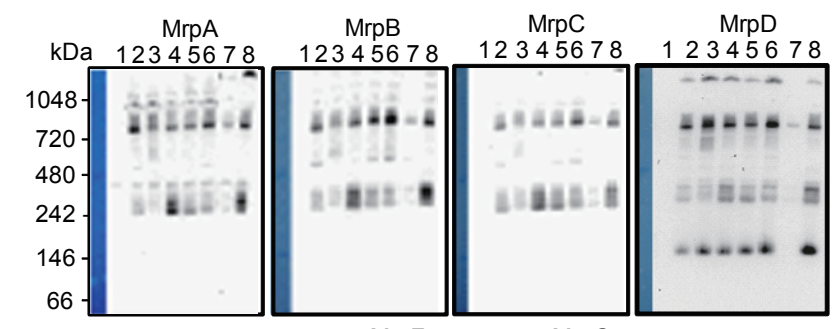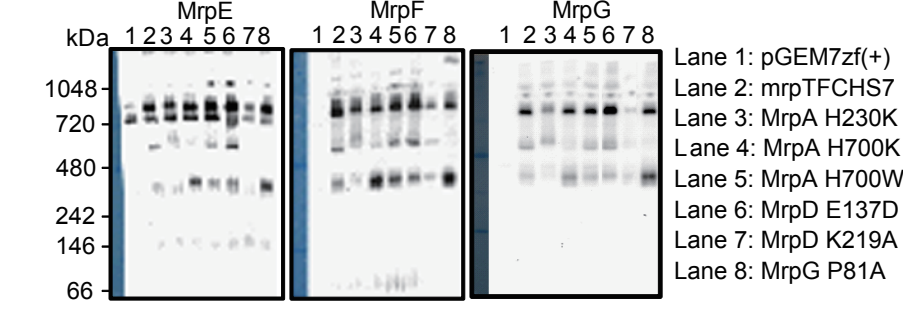

Figure S6

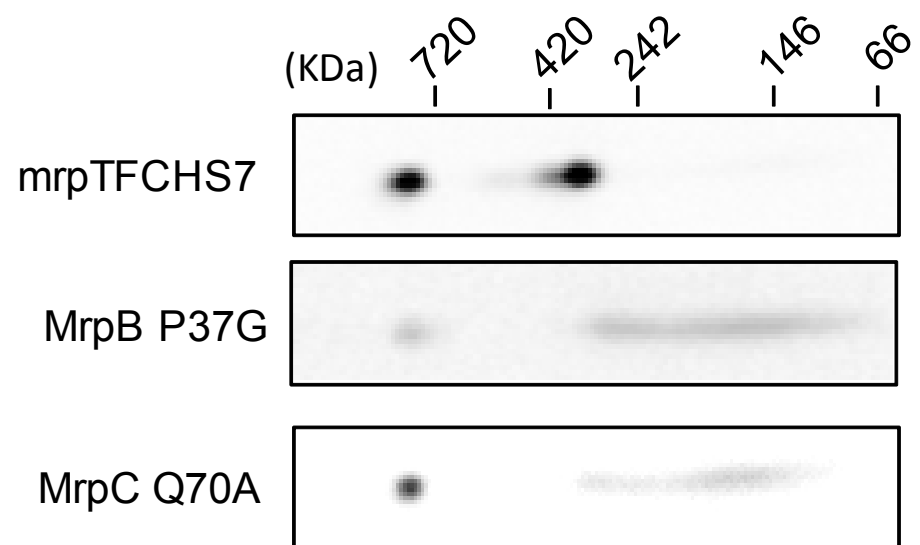

Supplement: supp_M110.118661_supplemental.pdf [file supp_M110.118661_supplemental.pdf]
